# Supplementary material for: Size-tunable synthesis of high-quality gold nanorods under basic conditions by using H2O2 as the reducing agent
Source: Royal Society of Chemistry journal article supplement (doi:10.1039/c4tc00483c), 2014-01-01
Supplement: c4tc00483c1.pdf [file c4tc00483c1.pdf]

Supporting information

# Size-Tunable Synthesis of High-Quality Gold Nanorods under Basic Conditions by Using H<sub>2</sub>O<sub>2</sub> as the Reducing Agent

Dong Xu, Jichuan Mao, Yan He\*, and Edward S. Yeung

State Key Laboratory of Chemo/Biosensing and Chemometrics, College of Chemistry and

Chemical Engineering, College of Biology

Hunan University, Changsha, 410082, P. R. China.

E-mail: [yanhe2021@gmail.com](mailto:yanhe2021@gmail.com)

## SUPPLEMENTARY FIGURES AND CAPTIONS

**Table S1.** The standard potentials in GNR formation

| Half reaction                                                                                           | Standard potential (V) |
|---------------------------------------------------------------------------------------------------------|------------------------|
| Au <sup>3+</sup> /Au <sup>+</sup>                                                                       |                        |
| $\text{AuBr}_4^- + 2\text{e}^- \rightarrow \text{AuBr}_2^- + 2\text{Br}^-$                              | +0.805                 |
| Au <sup>+</sup> /Au <sup>0</sup>                                                                        |                        |
| $\text{AuBr}_2^- + \text{e}^- \rightarrow \text{Au}^0 + 2\text{Br}^-$                                   | +0.962                 |
| O <sub>2</sub> /H <sub>2</sub> O <sub>2</sub>                                                           |                        |
| $\text{O}_2 + 2\text{H}^+ + 2\text{e}^- \rightarrow \text{H}_2\text{O}_2$                               | +0.682                 |
| Ascorbic acid                                                                                           |                        |
| $\text{C}_6\text{H}_6\text{O}_6 + 2\text{H}^+ + 2\text{e}^- \rightarrow \text{C}_6\text{H}_8\text{O}_6$ | +0.13                  |

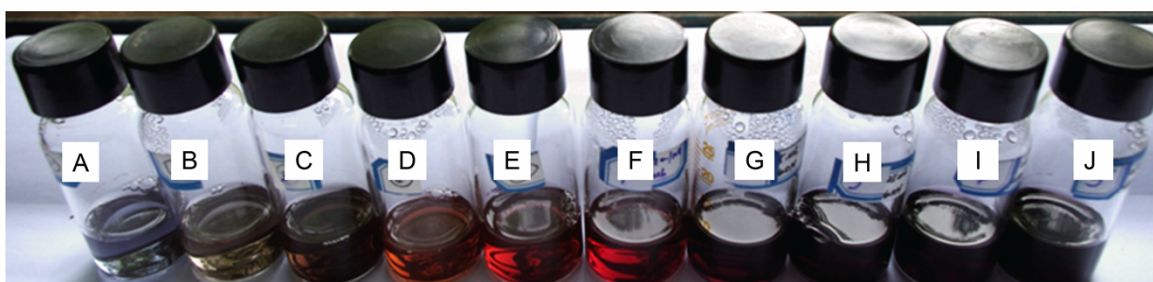

**Figure S1.** Photos of GNR solutions with increasing amount of NaOH addition. From A to J:

17.5 $\mu$ l, 22.5 $\mu$ l, 27.5 $\mu$ l, 32.5 $\mu$ l, 37.5  $\mu$ l, 50 $\mu$ l, 100 $\mu$ l, 150 $\mu$ l, 200 $\mu$ l, 350 $\mu$ l.

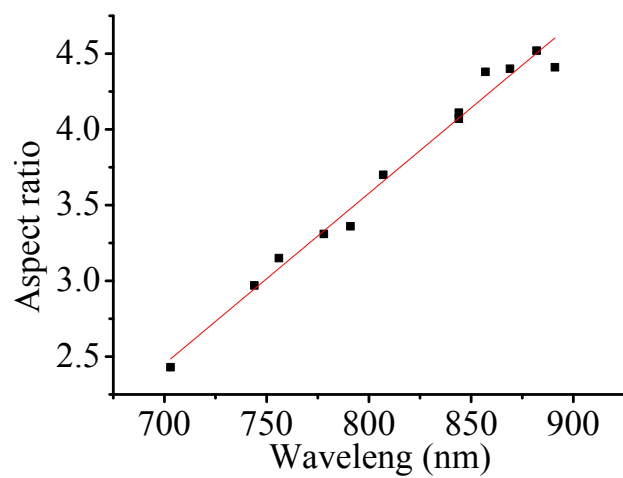

**Figure S2.** The aspect ratio of the GNRs versus longitudinal surface plasmon peak.

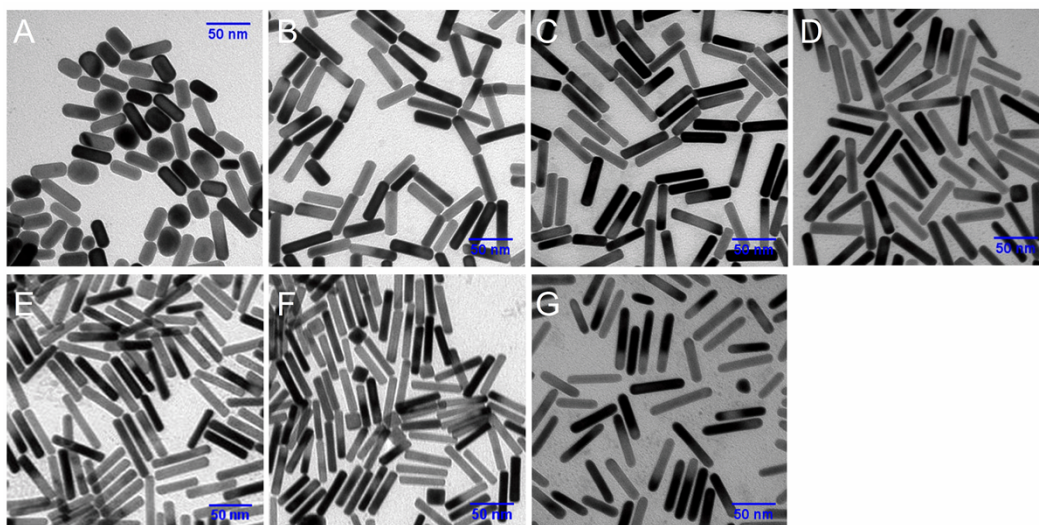

**Figure S3.** TEM images of the GNRs obtained with different  $\text{Ag}^+$  concentrations. (A)  $2 \times 10^{-5} \text{M}$ , (B)  $4 \times 10^{-5} \text{M}$  (C)  $6 \times 10^{-5} \text{M}$ , (D)  $8 \times 10^{-5} \text{M}$ , (E)  $1 \times 10^{-4} \text{M}$ , (F)  $1.2 \times 10^{-4} \text{M}$ , (G)  $1.4 \times 10^{-4} \text{M}$ .
